1  
2  
3  
4  
5  
6  
7  
8  
9  
10  
11  
12  
13  
14  
15  
16  
17  
18  
19  
20  
21  
22  
23  
24  
25  
26  
27  
28

**Engineering acetyl-CoA metabolic shortcut for eco-friendly  
production of polyketides triacetic acid lactone in *Yarrowia lipolytica***

Huan Liu<sup>1,2</sup>, Monireh Marsafari<sup>1,3</sup>, Fang Wang<sup>2</sup>, Li Deng<sup>2,\*</sup> and Peng Xu<sup>1,\*</sup>

<sup>1</sup>Department of Chemical, Biochemical and Environmental Engineering, University of Maryland, Baltimore County, Baltimore, MD 21250.

<sup>2</sup>College of Life Science and Technology, Beijing University of Chemical Technology, Beijing, China.

<sup>3</sup>Department of Agronomy and Plant Breeding, University of Guilan, Rasht, Islamic Republic of Iran

---

\* Corresponding author Tel: +1(410)-455-2474; fax: +1(410)-455-1049.

E-mail address: pengxu@umbc.edu (PX) and dengli@mail.buct.edu.cn (LD).

29 **Abstract**

30 Acetyl-CoA is the central metabolic node connecting glycolysis, Krebs cycle and  
31 fatty acids synthase. Plant-derived polyketides, are assembled from acetyl-CoA and  
32 malonyl-CoA, represent a large family of biological compounds with diversified  
33 bioactivity. Harnessing microbial bioconversion is considered as a feasible approach  
34 to large-scale production of polyketides from renewable feedstocks. Most of the  
35 current polyketide production platform relied on the lengthy glycolytic steps to  
36 provide acetyl-CoA, which inherently suffers from complex regulation with  
37 metabolically-costly cofactor/ATP requirements. Using the simplest polyketide  
38 triacetic acid lactone (TAL) as a target molecule, we demonstrate that acetate uptake  
39 pathway in oleaginous yeast (*Yarrowia lipolytica*) could function as an acetyl-CoA  
40 shortcut to achieve metabolic optimality in producing polyketides. We identified the  
41 metabolic bottlenecks to rewire acetate utilization for efficient TAL production in *Y.*  
42 *lipolytica*, including generation of the driving force for acetyl-CoA, malonyl-CoA and  
43 NADPH. The engineered strain, with the overexpression of endogenous acetyl-CoA  
44 carboxylase (ACC1), malic enzyme (MAE1) and a bacteria-derived cytosolic  
45 pyruvate dehydrogenase (PDH), affords robust TAL production with titer up to 4.76  
46 g/L from industrial glacier acetic acid in shake flasks, representing 8.5-times  
47 improvement over the parental strain. The acetate-to-TAL conversion ratio (0.149 g/g)  
48 reaches 31.9% of the theoretical maximum yield. The carbon flux through this  
49 acetyl-CoA metabolic shortcut exceeds the carbon flux afforded by the native  
50 acetyl-CoA pathways. Potentially, acetic acid could be manufactured in large-quantity  
51 at low-cost from Syngas fermentation or heterogenous catalysis (methanol  
52 carbonylation). This alternative carbon sources present a metabolic advantage over  
53 glucose to unleash intrinsic pathway limitations and achieve high carbon conversion  
54 efficiency and cost-efficiency. This work also highlights that low-cost acetic acid  
55 could be sustainably upgraded to high-value polyketides by oleaginous yeast species  
56 in an eco-friendly and cost-efficient manner.

57

58 **Keywords:** *Yarrowia lipolytica*, acetic acid, metabolic shortcut, cytosolic acetyl-CoA,  
59 triacetic acid lactone (TAL), orthogonal pyruvate dehydrogenase complex

60

61

62

63

64

65

## 66 1. Introduction

67 To reduce our dependence on fossil fuels and mitigate climate change concerns,  
68 researchers have started seeking alternative routes to produce fuels and commodity  
69 chemicals. Motivated by the abundant supply of renewable feedstock and  
70 agricultural waste byproducts, biochemical engineers have been able to harness  
71 various cellular metabolism to build efficient microbe cell factories with the hope to  
72 upgrade the petroleum-based chemical manufacturing process. Our increasing  
73 knowledge on microbial physiology, biochemistry and cellular genetics and  
74 sophisticated synthetic biology tools have enabled us to explore a variety of host  
75 strains with the promise to produce large volume of green and commodity chemicals,  
76 including butanol, isobutanol, 1,3-PDO, 1,4-butanediol, organic acids, amino acids,  
77 and fatty acids-based fuels *et al* in the past two decades (Zambanini, Kleineberg et al.  
78 2016, Liu, Hu et al. 2017, Liu, Zhao et al. 2017, Awasthi, Wang et al. 2018).

79 Triacetic acid lactone (TAL) is an important platform chemical with a broad  
80 spectrum of industrial applications ranging from organic synthesis, polymer  
81 plasticizers, adhesives to emulsifiers. It is the precursor for the synthesis of fungicides  
82 and fine chemicals including 1,3,5-trihydroxybenzene, resorcinol, phloroglucinol *et al*  
83 (Hansen 2002). TAL is currently manufactured from chemical catalysis with  
84 petroleum-derived dehydroacetic acid followed by acidolysis with concentrated  
85 sulfuric acid (H<sub>2</sub>SO<sub>4</sub>) at high temperature (Weissermel 2008). The use of petroleum  
86 feedstock, environmentally-unfriendly catalysts and the generation of toxic  
87 byproducts limit its industrial application as green chemicals (Chia, Schwartz et al.  
88 2012). Therefore, there is a pressing need to develop low-cost and eco-friendly  
89 platform for sustainable production of TAL from renewable feedstocks.

90 By manipulating acetyl-CoA and malonyl-CoA metabolism in bacteria and yeast,  
91 metabolic engineers have established a number of TAL-producing host strains with *E.*  
92 *coli*, *S. cerevisiae*, *Y. lipolytica et al* (Tang, Qian et al. 2013, Cardenas and Da Silva  
93 2014, Li, Qian et al. 2018, Markham, Palmer et al. 2018). Due to cellular toxicity  
94 issues, *E. coli*, was found to be a less promising producer to accumulate TAL (Xie,  
95 Shao et al. 2006). On the contrary, *S. cerevisiae* and *Y. lipolytica* were insensitive to  
96 TAL even at concentrations up to 200 mM (25.7 g/L), opening the opportunity for us  
97 to biologically synthesize TAL in large quantity. For example, a recent study has  
98 surveyed a large panel of metabolic pathways involving energy storage and generation,  
99 pentose biosynthesis, gluconeogenesis and lipid biosynthesis, to improve TAL  
100 production in *S. cerevisiae* (Cardenas and Da Silva 2014). In another study,  
101 recycling cytosolic NADPH and limiting intracellular acetyl-CoA transportation were  
102 also found as efficient strategies to enhance TAL accumulation in *S. cerevisiae*  
103 (Cardenas and Da Silva 2016). Compared with *S. cerevisiae*, *Y. lipolytica*, a natural

104 lipid producer, has recently been identified as an attractive industrial workhorse to  
105 produce various compounds due to its broad substrate range, high acetyl-CoA and  
106 malonyl-CoA flux as well as the availability of facile genetic manipulation tools  
107 (Markham and Alper 2018, Lv, Edwards et al. 2019). These features indicate that *Y.*  
108 *lipolytica* could be engineered as a superior host to produce acetyl-CoA and  
109 malonyl-CoA-derived compounds beyond lipid-based chemicals. Indeed, genetically  
110 rewired lipogenic pathways have achieved great success to produce lycopene,  
111 carotenoids, flavonoids and polyketides in *Y. lipolytica* (Xu, Li et al. 2014, Xu, Qiao  
112 et al. 2016, Qiao, Wasylenko et al. 2017, Xu, Qiao et al. 2017, Yu, Landberg et al.  
113 2018). In a recent study, heterologous expression of 2-pyrone synthase along with the  
114 cytosolic expression of alternative acetyl-CoA pathways have been implemented to  
115 collectively improve TAL production up to 35.9 g/L in a bench-top reactors, with  
116 yield up to 43% of the theoretical yield from glucose (Markham, Palmer et al. 2018),  
117 highlighting the potential of using this yeast for large-scale production of polyketides.

118 Acetate presents in high levels in waste streams (municipal organic waste via  
119 anaerobic digestion) and lignocellulosic hydrolysates; acetate could also be  
120 synthesized from methanol carbonylation at very low cost (about \$340 per metric ton)  
121 (Qian, Zhang et al. 2016). And methanol could be abundantly produced by methane  
122 oxidation with heterogenous catalysis. These facts indicate that acetic acid will be a  
123 promising, sustainable and low-cost carbon source for industrial fermentation. To  
124 systematically understand the limiting cofactors associated with polyketide production  
125 in oleaginous yeast, we use TAL biosynthetic pathway as a testbed and investigated an  
126 arrange of biological factors including cofactor (NADPH) supply, orthogonal  
127 acetyl-CoA and malonyl-CoA availability, lipogenesis competition, substrate  
128 suitability and pH conditions (**Fig. 1**). Stepwise optimization of these parameters led  
129 to an 8.5-times improvement of TAL production (4.76 g/L) from industrial-grade  
130 acetic acid (glacial acid), with acetic acid-to-TAL yield at 31.9% of the theoretical  
131 yield. The reported acetyl-CoA shortcut pathway delineates a strong case that we  
132 could engineer *Y. lipolytica* as an eco-friendly platform to upgrade industrial acetic  
133 acids to commodity chemicals. This work also expands our capacity to produce green  
134 chemicals from sustainable feedstocks; in particular, acetic acid could be efficiently  
135 incorporated as carbon source for cost-efficient production of various polyketides in *Y.*  
136 *lipolytica*.

137



157 10 g/L yeast extract (Difco), and 20 g/L glucose (Sigma-Aldrich), and supplemented  
158 with 15 g/L Bacto agar (Difco) for agar plates. YNB medium with carbon/nitrogen  
159 ratio 10:1 for seed culture was made with 1.7 g/L yeast nitrogen base (without amino  
160 acids and ammonium sulfate) (Difco), 5 g/L ammonium sulfate (Sigma-Aldrich), 0.69  
161 g/L CSM-Leu (Sunrise Science Products, Inc.) and 20 g/L glucose. Selective YNB  
162 plates were made with YNB media with carbon/nitrogen ratio 10:1 supplemented with  
163 15 g/L Bacto agar (Difco). YNB fermentation medium with glucose as substrate and  
164 carbon/nitrogen ratio 80:1 was made with 1.7 g/L yeast nitrogen base (without amino  
165 acids and ammonium sulfate) (Difco), 1.1 g/L ammonium sulfate (Sigma-Aldrich),  
166 0.69 g/L CSM-Leu (Sunrise Science Products, Inc.) and 40 g/L glucose.

167 Phosphoric buffer solution (PBS) with pH 6.0 was made with 0.2 M Na<sub>2</sub>HPO<sub>4</sub>  
168 and 0.2 M Na<sub>2</sub>HPO<sub>4</sub>, which was used to replace water to make YNB- glucose-PBS  
169 fermentation medium. YNB fermentation medium with sodium acetate as substrate  
170 and carbon/nitrogen ratio 80:1 was made with 1.7 g/L yeast nitrogen base (without  
171 amino acids and ammonium sulfate) (Difco), 0.825 g/L ammonium sulfate  
172 (Sigma-Aldrich), 0.69 g/L CSM-Leu (Sunrise Science Products, Inc.), 41 g/L sodium  
173 acetate. Glacial acetic acids were purchased from Sigma-Aldrich. Bromocresol purple  
174 was a pH-sensitive indicator which could change its color with the pH from 5.2-7.0  
175 (El-Ashgar, El-Basioni et al. 2012) and 40 mg/L bromocresol purple was added into  
176 fermentation medium to indicate pH variation. The pH of medium was regulated to  
177 6.0 by 6.0 M HCl in the fermentation process. And 1 mg/L cerulenin solution  
178 prepared with dimethylsulfoxide (DMSO) was added into fermentation medium to  
179 inhibit precursor competing pathway.

180 In TAL production process, single *Y. lipolytica* colonies were picked from YNB  
181 selective plates and inoculated into YNB seed liquid media, which were grown at  
182 30 °C for 48 h. For tube test, 100 µL seed cultures were inoculated into 5 mL  
183 fermentation media in 50 mL tube. 600 µL seed cultures were inoculated into 30 mL  
184 fermentation media in 250 mL shake flasks with 250 rpm and 30 °C. Time series  
185 samples were taken for analyzing biomass, sugar content, and TAL titer.

## 186 2.2 Plasmid construction

187 All primers are listed in supplementary Table S2. All restriction enzymes were  
188 purchased from Fisher FastDigest enzymes. Plasmid miniprep, PCR clean-up, and gel  
189 DNA recoveries were using Zyppy and Zymoclean kits purchased from Zymo  
190 research. All the genes, except for *GH2PS*, were PCR-amplified with the primers  
191 from genomic DNA of *Y. lipolytica*, *S. cerevisiae*, *E. coli*, *B. subtilis*, *Aspergillus*  
192 *nidulans*, respectively (Supplementary Table S1 and Table S2). *GH2PS* were  
193 codon-optimized according to the human codon usage table. All these genes were  
194 inserted into downstream of the *Y. lipolytica* TEF-intron promoter in the pYLXP'

195 vector backbone (Wong, Engel et al. 2017) at the *Sna*BI and *Kpn*I site via Gibson  
196 assembly (Gibson, Young et al. 2009). Upon sequence verification by Genewiz, the  
197 restriction enzyme *Avr*II, *Nhe*I, *Not*I, *Cla*I and *Sal*I (Fermentas, Thermo Fisher  
198 Scientific) were used to digest these vectors, and the donor DNA fragments were gel  
199 purified and assembled into the recipient vector containing previous pathway  
200 components via YaliBricks subcloning protocol (Wong, Holdridge et al. 2019). All  
201 assembled plasmids were verified by gel digestion and were subsequently transformed  
202 into the *Y. lipolytica* host strain Po1g  $\Delta$ Leu using the lithium acetate/single-strand  
203 carrier DNA/PEG method (Chen, Beckerich et al. 1997). In vector integration process,  
204 pYLXP' vector assembled with functional genes was linearized by restriction enzyme  
205 *Not*I (Fermentas, Thermo Fisher Scientific). The linear fragment was transformed into  
206 the *Y. lipolytica* host strain Po1g  $\Delta$ Leu for chromosomal gene integration.

### 207 *2.3 Analytical methods*

208 The cell growth was monitored by measuring the optical density at 600 nm  
209 (OD<sub>600</sub>) with a UV-vis spectrophotometer that could also be converted to dry cell  
210 weight (DCW) according to the calibration curve DCW : OD<sub>600</sub> = 0.33:1 (g/L). The  
211 fermentation broth was centrifuged at 14,000 rpm for 5 min and the supernatant was  
212 used for analyzing the concentration of TAL, glucose, mannitol, acetic acid by HPLC  
213 with a Supelcogel™ Carbohydrate column (Sigma). Retention times for each tested  
214 chemical were listed in Supplementary Table S3. The quantification of TAL was  
215 analyzed by an UV absorbance detector at 280 nm, while glucose, mannitol, acetic  
216 acid was examined by a refractive index detector. The column was eluted with 10 mM  
217 H<sub>2</sub>SO<sub>4</sub> at a column temperature of 50°C, a refractive index detector at temperature of  
218 50°C, and a flow rate of 0.4 mL/min. All chemical standards were purchased from  
219 Sigma-Aldrich and standard curve were built to derive the area-concentration  
220 relationship. All reported results are three measures with standard deviations.

221

## 222 **3. Results and discussion**

### 223 *3.1 Boosting precursor malonyl-CoA to improve TAL production in Y. lipolytica*

224 It has been well characterized that the plant-derived 2-pyrose synthase (2-PS) is  
225 a type III polyketide synthase (Jez, Austin et al. 2000). Specifically, 2-PS from daisy  
226 family plant *Gerbera hybrida* was found to efficiently synthesize triacetic acid lactone  
227 (TAL) by joining one acetyl-CoA with two extender malonyl-CoA molecules (Jez,  
228 Ferrer et al. 2001, Austin and Noel 2003, Xie, Shao et al. 2006). To test TAL  
229 production, the coding sequence of *G. hybrida* 2-pyrone synthase (GH2PS, Uniprot  
230 ID: P48391) was codon-optimized and overexpressed in *Y. lipolytica*, yielding 0.5 g/L  
231 of TAL at 120 h with chemically-defined complete synthetic media (CSM-leu) in test  
232 tube (**Fig. 2A**), demonstrating the potential of using *Y. lipolytica* as a platform to

233 synthesize various polyketides.

234

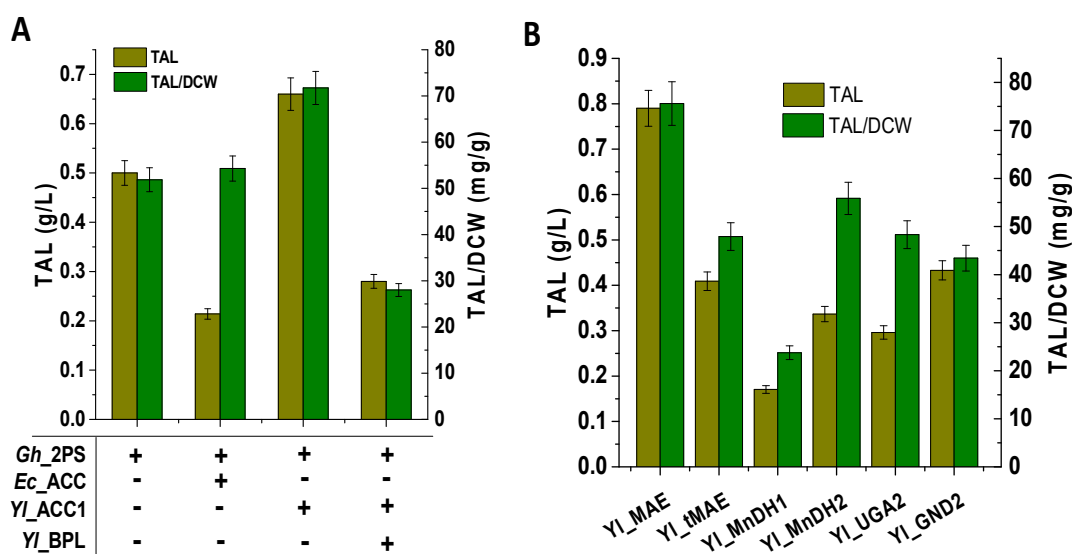

235

236 **Fig. 2** Engineering precursor pathway to improve TAL production in *Y. lipolytica*. (A)  
 237 Comparison of TAL production from native acetyl-CoA carboxylase (ylACC1) and  
 238 bacteria-derived acetyl-CoA carboxylase (EcACC). (B) Comparison of TAL  
 239 production from alternative cytosolic NADPH pathways in *Y. lipolytica*.

240

241 It's generally believed that malonyl-CoA is the rate-limiting precursor for  
 242 polyketide synthase (Zha, Rubin-Pitel et al. 2009, Xu, Ranganathan et al. 2011). We  
 243 next sought to overexpress the bacteria-derived acetyl-CoA-carboxylase and the  
 244 endogenous ACC1, to test whether the conversion of acetyl-CoA to malonyl-CoA  
 245 would facilitate TAL synthesis. *E. coli* intracellular malonyl-CoA could be enhanced  
 246 by overexpression of the four subunits of acetyl-CoA-carboxylase (accABCD) along  
 247 with the expression of the biotinylating enzyme (biotin ligase encoded by *BirA*),  
 248 leading to significantly improved production of both flavonoids and fatty acids  
 249 (Leonard, Lim et al. 2007, Zha, Rubin-Pitel et al. 2009, Xu, Ranganathan et al. 2011,  
 250 Xu, Gu et al. 2013). With the YaliBrick gene assembly platform (Wong, Engel et al.  
 251 2017), we assembled the four catalyzing subunits (accABCD) and the biotinylating  
 252 subunit (*BirA*). Interestingly, a negative effect was observed when these gene clusters  
 253 were introduced to *Y. lipolytica*, resulting in 40% of TAL production compared to the  
 254 parental strain. These results indicate that the bacterial-derived acetyl-CoA  
 255 carboxylase could not be directly translated to yeast system, presumably due to the  
 256 depletion of biotins or the protein burden stress of heterologous gene expression,  
 257 albeit the specific TAL production (mg/gDCW) is about 4.2% higher (Fig. 2A).  
 258 Endogenous *ylACC1*, a single polypeptide encoded by YALI0C11407 with two



259 internal introns removed, was also selected to co-express with *Gh2PS*, leading to TAL  
260 production increased to 0.66 g/L (Fig. 2A), indicating that overexpression of native  
261 ACC1 was beneficial for the TAL production. To test whether endogenous biotin  
262 ligase (BPL) was required to improve ACC1 activity (Pendini, Bailey et al. 2008), we  
263 co-expressed BPL1 (encoded by YALI0E3059). Similarly, degenerated production  
264 titer was observed in our experiment (Fig. 2A), indicating that biotin ligase is likely  
265 not the rate-limiting step for ACC1 activity in *Y. lipolytica*.

266

### 267 **3.2 Recycling cytosolic NADPH to improve TAL production in *Y. lipolytica***

268 NADPH, the primary biological reducing equivalent to protect cell from  
269 oxidative stress and extend carbon-carbon backbones, has been reported as the major  
270 rate-limiting precursor in fatty acids and lipids synthesis in oleaginous species  
271 (Ratledge and Wynn 2002, Ratledge 2014, Wasylenko, Ahn et al. 2015, Qiao,  
272 Wasylenko et al. 2017). Source of cytosolic NADPH in Baker's yeast was contributed  
273 from various alternative routes (Minard, Jennings et al. 1998, Grabowska and  
274 Chelstowska 2003, Minard and McAlister-Henn 2005), depending on the carbon  
275 source and genetic background of the yeast strain. With glucose as carbon sources,  
276 cytosolic NADPH relies on the pentose phosphate pathway. Using TAL as the target  
277 molecule, we tested a collection of auxiliary cytosolic NADPH pathways (Liu,  
278 Marsafari et al. 2019) and investigated whether these alternative pathways would  
279 improve TAL production and cellular fitness (**Fig. 1**). These cytosolic NADPH  
280 pathways include malic enzyme (ylMAE), mannitol dehydrogenase (ylMnDH1,  
281 ylMnDH2), 6-phosphogluconate dehydrogenase (ylGND2) and succinate  
282 semialdehyde dehydrogenase (ylUGA2), which were reported to contribute to  
283 NADPH metabolism in various fungal species (Suye and Yokoyama 1985, Minard,  
284 Jennings et al. 1998, Wynn, bin Abdul Hamid et al. 1999, Grabowska and  
285 Chelstowska 2003, Minard and McAlister-Henn 2005, Rodríguez-Frómata, Gutiérrez  
286 et al. 2013, Liu, Marsafari et al. 2019).

287 Among these chosen NADPH source pathway, malic enzyme (MAE, encoded by  
288 YALI0E18634) presented the best results to improve TAL production (**Fig. 2B**). MAE  
289 was a NADP<sup>+</sup>-dependent enzyme that oxidatively decarboxylates malate to pyruvate  
290 and provides NADPH for lipid biosynthesis in oleaginous species (Ratledge 2014).  
291 When ylMAE was overexpressed with *GH2PS* and *ylACCI* (strain *HLYali101*), it  
292 showed a 60% increase in TAL titer and the volumetric production was increased to  
293 0.8 g/L with a specific yield of 75.6 mg/g DCW (**Fig. 2B**). It is generally believed that  
294 ylMAE was localized in mitochondria (Zhang, Zhang et al. 2013, Ratledge 2014), we  
295 performed bioinformatic studies with TargetP 1.1 (Nielsen, Engelbrecht et al. 1997,  
296 Emanuelsson, Nielsen et al. 2000) and predicted that the first 78 nucleotides of

297 ylMAE encodes a 26 AA leader peptide which is responsible for mitochondria  
298 targeting. We then overexpressed the truncated ylMAE (t78ylMAE) with the  
299 N-terminal MTS removed to compare how the variation of ylMAE may affect TAL  
300 synthesis. Contrary to our hypothesis, removal of the MTS signal of ylMAE exhibits  
301 adverse effect on both TAL production and cell growth (**Fig. 2B**). qPCR results  
302 confirmed that the ylMAE mRNA abundance was 6.8 times higher compared to the  
303 strain without ylMAE overexpression. This result indicates that the 78 nt MTS  
304 sequence is essential to the function of ylMAE. Deletion of the N-terminal 78 nt MTS  
305 sequence renders the cell with less MAE catalytic efficiency and leads to degenerated  
306 production phenotype.

307 Protein subcellular location in fungi has been reported to not just depend on the  
308 leader peptide sequence. For example, both *S. cerevisiae* acetyl-CoA synthase (ACS)  
309 and *Y. lipolytica* malate dehydrogenase (MDH) could move across the mitochondria  
310 or peroxisome membrane boundary to function as cytosolic enzymes, depending on  
311 the carbon source and environmental conditions (Chen, Siewers et al. 2012, Kabran,  
312 Rossignol et al. 2012, Krivoruchko, Zhang et al. 2015). In particular, one of the  
313 proven mechanisms is related with alternative splicing of mRNA transcripts in *Y.*  
314 *lipolytica*: where the N-terminal mRNA sequence of malate dehydrogenase could be  
315 spliced in different ways to facilitate the mature peptide targeting to distinct cellular  
316 compartment (Mekouar, Blanc-Lenfle et al. 2010, Kabran, Rossignol et al. 2012).  
317 This mechanism indicates the complicated regulation of malic enzyme in *Y. lipolytica*,  
318 highlighting that overcoming metabolite trafficking may have positive effect on  
319 TAL accumulation. Increased TAL production could also be linked to the sufficient  
320 supply of precursor malonyl-CoA, possibly due to the balanced expression of Gh2PS  
321 and ACC1, which presumably creates a metabolic sink and pushes the equilibrium of  
322 ylMAE to function in the forward direction.

323

### 324 ***3.3 Engineering orthogonal pyruvate dehydrogenase complex to boost TAL*** 325 ***production in Y. lipolytica***

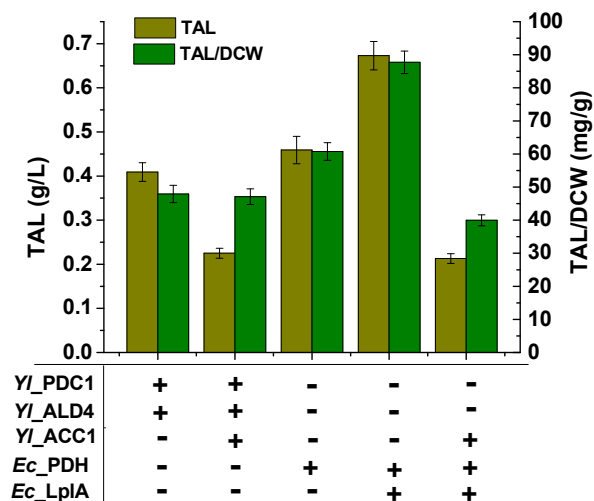

326

327 **Fig. 3** Engineering cytosolic acetyl-CoA pathway to improve TAL production in *Y.*  
 328 *lipolytica*. YlPDC1, pyruvate decarboxylase; ylALD4, aldehyde dehydrogenase;  
 329 EcPDH, pyruvate dehydrogenase comple; EcLplA, lipoate-protein ligase A.

330 Acetyl-CoA, derived from the central carbon metabolism (glycolysis and Krebs  
 331 cycle), was the starting molecule in TAL synthesis. Acetyl-CoA is also the central hub  
 332 for lipid synthesis, peroxisomal lipid oxidation and amino acid degradation pathway  
 333 (Chen, Siewers et al. 2012, Krivoruchko, Zhang et al. 2015). Engineering alternative  
 334 pathways to enhance cytosolic acetyl-CoA have been proven as efficient strategy to  
 335 improve fatty acids and oleochemical production in both Bakers' yeast and *Y.*  
 336 *lipolytica* (Kozak, van Rossum et al. 2014, van Rossum, Kozak et al. 2016, Xu, Qiao  
 337 et al. 2016). Here we explored two independent metabolic engineering strategies to  
 338 improve the oxidation of pyruvate to cytosolic acetyl-CoA. First, we investigated the  
 339 endogenous pyruvate decarboxylase (PDC), acetylaldehyde dehydrogenase (ALD)  
 340 and acetyl-CoA synthase (ACS) route, which decarboxylates pyruvate to acetaldehyde  
 341 by PDC, oxidizes acetaldehyde to acetate by ALD, ligates acetate with CoASH to  
 342 form acetyl-CoA by ACS (Flores, Rodríguez et al. 2000). Previous results have  
 343 demonstrated that we can increase lipid production when the PDC-ALD genes were  
 344 overexpressed in *Y. lipolytica* (Xu, Qiao et al. 2016). Comparison of the results by  
 345 combinatorially overexpressing PDCs and ALDs along with GH2PS and MAE, the  
 346 best result was obtained from the strain *HLYali102*, yielding only 0.4 g/L of TAL (**Fig.**  
 347 **3**). We speculated that the synthesis process was possibly limited by the supply of  
 348 malonyl-CoA. Endogenous *ylACC1* gene was further assembled to the previous  
 349 pathway, however, no significant TAL improvement was observed in shake flasks  
 350 (**Fig. 3**). These results indicate the complicated regulation of acetyl-CoA and  
 351 malonyl-CoA metabolism. In particular, Snf1-mediated AMP kinase may  
 352 phosphorylate ACC1 to repress ACC1 activity (Shi, Chen et al. 2014), the

353 accumulated acetyl-CoA may lead to histone acetylation and global transcriptional  
354 change (Zhang, Galdieri et al. 2013). It could also point out a negative feedback loop  
355 of acetyl-CoA regulation: accumulated acetyl-CoA and NADH will undergo oxidative  
356 phosphorylation to generate ATP in mitochondria, which instead leads to weaker  
357 phosphorylating activity of SNF1 and elevated ACC1 activity that converts  
358 acetyl-CoA to malonyl-CoA (Mihaylova and Shaw 2011, Hsu, Liu et al. 2015).

359 We next attempted a bacterial-derived pyruvate dehydrogenase (PDH) complex  
360 pathway, which is orthogonal to *Y. lipolytica* metabolism. Pyruvate dehydrogenase  
361 complex (PDH), as a ubiquitous enzyme found in all kingdoms of life, catalyzed the  
362 oxidative decarboxylation of pyruvate to acetyl-CoA, forming the connection between  
363 glycolysis, the tricarboxylic acid cycle (TCA) and lipid biosynthesis (Kozak, van  
364 Rossum et al. 2014). As for all eukaryotic life including *Y. lipolytica*, PDH was  
365 localized in the mitochondrial matrix to provide acetyl-CoA for operating Krebs cycle.  
366 This mitochondrial acetyl-CoA could not be converted to TAL in the cytosol. To solve  
367 this challenge, we investigated whether the expression of the *E. coli* PDH would  
368 benefit TAL synthesis in *Y. lipolytica*. Specifically, we assembled the genes encoding  
369 the three catalytic subunits of PDH with our YaliBrick vectors (Wong, Engel et al.  
370 2017): including pyruvate dehydrogenase (AceE, E1), dihydrolipoyllysine-residue  
371 acetyltransferase (AceF, E2), and lipoamide dehydrogenase (LpdA, E3). Nevertheless,  
372 when these three genes were assembled together and overexpressed along with  
373 GH2PS, only 0.46 g/L TAL was detected (**Fig. 3**). It has been discovered recently that  
374 the functional expression of bacterial PDH in *S. cerevisiae* requires the co-expression  
375 of lipoate-protein ligase A (Kozak, van Rossum et al. 2014, Kozak, van Rossum et al.  
376 2014, Nielsen 2014), which plays a pivotal role in lipoylating E2 subunits of PDH.  
377 Similar to Baker's yeast, the two annotated lipoyltransferase or lipoate ligase in *Y.*  
378 *lipolytica* (YALI0C03762 and YALI0F27357 respectively) are exclusively localized  
379 in mitochondria (Sulo and Martin 1993, Hermes and Cronan 2013, Cronan 2016). To  
380 enable cytosolic lipoylation and complement the bacterial PDH function, we next  
381 co-expressed the lipoate-protein ligase A (LplA), TAL production was increased to  
382 0.67 g/L with specific yield up to 87.72 mg/gDCW (strain HLYali103) (**Fig. 3** and  
383 Table S4), indicating the essential role of EcLplA as an indispensable component for  
384 the *E. coli* PDH functionality. This was the first report to functionally express the  
385 bacteria-derived EcPDH with EcLplA in *Y. lipolytica*. Creating this orthogonal  
386 acetyl-CoA route may bypass internal pathway regulations, providing a promising  
387 path to overcome metabolic limitations and improve metabolite production in *Y.*  
388 *lipolytica*.

389 Posttranslational modification of apoproteins with lipoyl groups was an  
390 important process for many enzymes. There were two complementary systems for

391 protein lipoylation in *E. coli*: one was exogenous route using an ATP-dependent  
392 process by lipoate-protein ligase A (LplA); another one required lipoyl-[acyl-carrier  
393 protein]-protein-N-lipoyltransferase (LipB) to transfer endogenously synthesized  
394 lipoate to apoproteins (Miller, Busby et al. 2000). Both of these two proteins were  
395 localized in mitochondria, which presents a critical challenge to functionally express  
396 cytosolic PHDs in yeast. The current studies provide a viable option to functionally  
397 express bacteria-derived cytosolic PDH steps and leads to significantly improved TAL  
398 production. This PDH should be easily transferrable to other metabolite production  
399 systems, should there is a need to boost cytosolic acetyl-CoAs.

400

### 401 3.4 Comparison of TAL production from glucose and acetic acid

402

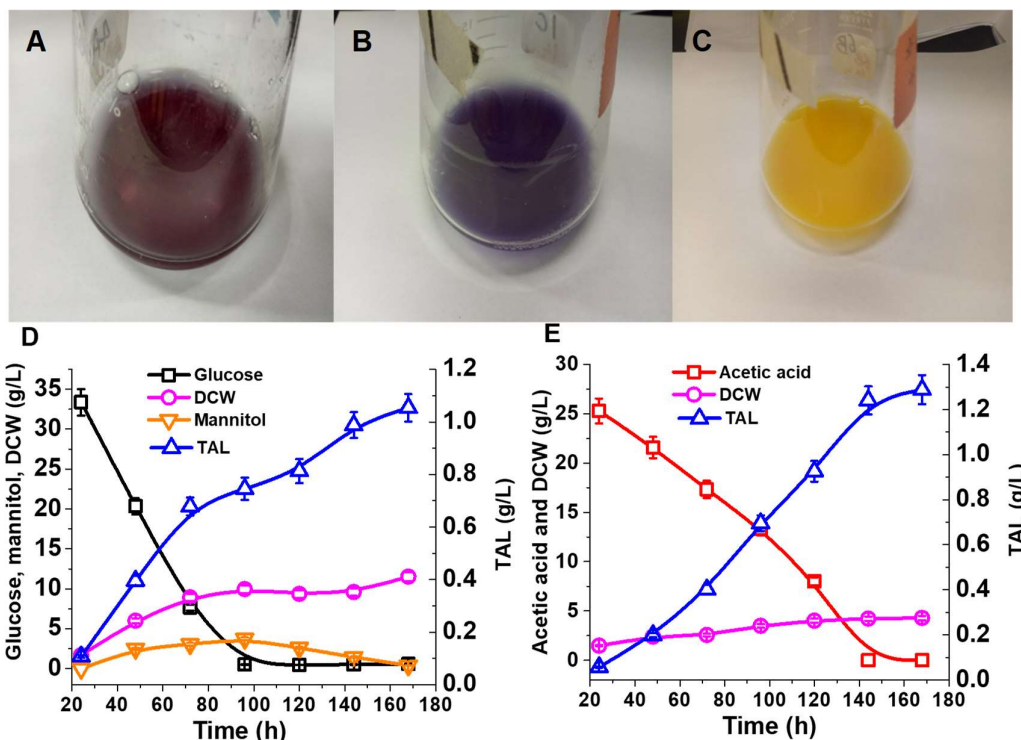

403

404

405 **Fig. 4** Eco-friendly production of TAL from glucose and acetic acid. (A~C) Color  
406 variation of medium with pH indicator bromocresol purple. (A): Initial sodium acetate  
407 (NaAc) medium with pH 6.0; (B): Strain cultured in NaAc medium after 48 h with pH  
408 above 8.0; (C): Strain cultured in glucose medium after 48 h with pH below 4.0. (D):  
409 TAL production from minimal media supplemented with glucose by *HLYali101*; (E):  
410 TAL production from minimal media supplemented with NaAc by *HLYali101*. When  
411 NaAc was used as substrate, the medium pH will increase with the consumption of  
412 acetate. We adjusted the pH to 6.0 by adding HCl. Bromocresol purple is a

413 pH-sensitive indicator to track the pH variations of fermentation process.

414

415 A unique feature of *Y. lipolytica* is the high acetyl-CoA flux and its broad  
416 substrate range, which makes this yeast an attractive host to degrade organic waste  
417 (volatile fatty acids, alkanes *et al*). Previous metabolic engineering effort has  
418 demonstrated that *Y. lipolytica* possesses strong acetate utilization pathway that is  
419 equivalent or even superior to the hexose utilization pathway. For example,  
420 triacylglyceride (TAG) production could be improved from ~100 g/L to ~115 g/L in  
421 bench-top bioreactors, when the engineered strain was switched from glucose media  
422 (Qiao, Wasylenko et al. 2017) to acetate media (Xu, Liu et al. 2017). To investigate  
423 how different carbon sources may affect TAL synthesis, both glucose and sodium  
424 acetate were tested to compare TAL production efficiency in our engineered strains.

425 As acetic acid (HAc) has a relatively low pKa (4.75), we used 41 g/L sodium  
426 acetate (NaAc), equivalently to 29.5 g/L acetic acid (HAc) to cultivate the engineered  
427 strain. As the cell uptakes acetic acid, the cultivation pH will keep increasing. An *in*  
428 *situ* pH indicator (bromocresol purple) was used to track the pH change and 6 M HCl  
429 was used to adjust the pH in the shake flask (**Fig. 4A, 4B** and **4C**). Controlling pH  
430 (Fig. 4A) led to the strain HLYali101 produced 1.05 g/L TAL in glucose-YNB  
431 medium, with 98% of glucose depleted and 11.53 g/L biomass produced (**Fig. 4D**).  
432 We also detected mannitol as a main byproduct, which increased to 3.7 g/L at 96 h  
433 and subsequently was utilized to support cell growth or TAL production (**Fig. 4D**).  
434 Strain HLYali101 produced about 1.29 g/L TAL from acetic acid with yield 300.69  
435 mg/g DCW (**Fig. 4E**), this yield represents 230% improvement compared to the yield  
436 obtained from glucose medium (91.06 mg/g DCW) (**Fig. 4D** and Table S4). Depletion  
437 of acetic acid occurred at 144 h and the DCW reached 4.29 g/L, which is about half of  
438 the biomass from glucose.

439 Our data demonstrate that *Y. lipolytica* could efficiently uptake acetic acid as sole  
440 carbon source to produce polyketides. By harnessing the endogenous acetate uptake  
441 pathway, this externally provided acetic acid bypassed the pyruvate dehydrogenase  
442 steps and created a metabolic “shortcut” to acetyl-CoA with improved carbon  
443 conversion efficiency and pathway yield. This acetyl-CoA flux exceeded the capacity  
444 of the orthogonal PDH pathway when glucose is used as carbon source.

445

446 ***3.5 pH control and modulating precursor competing pathway to improve TAL***  
447 ***production***

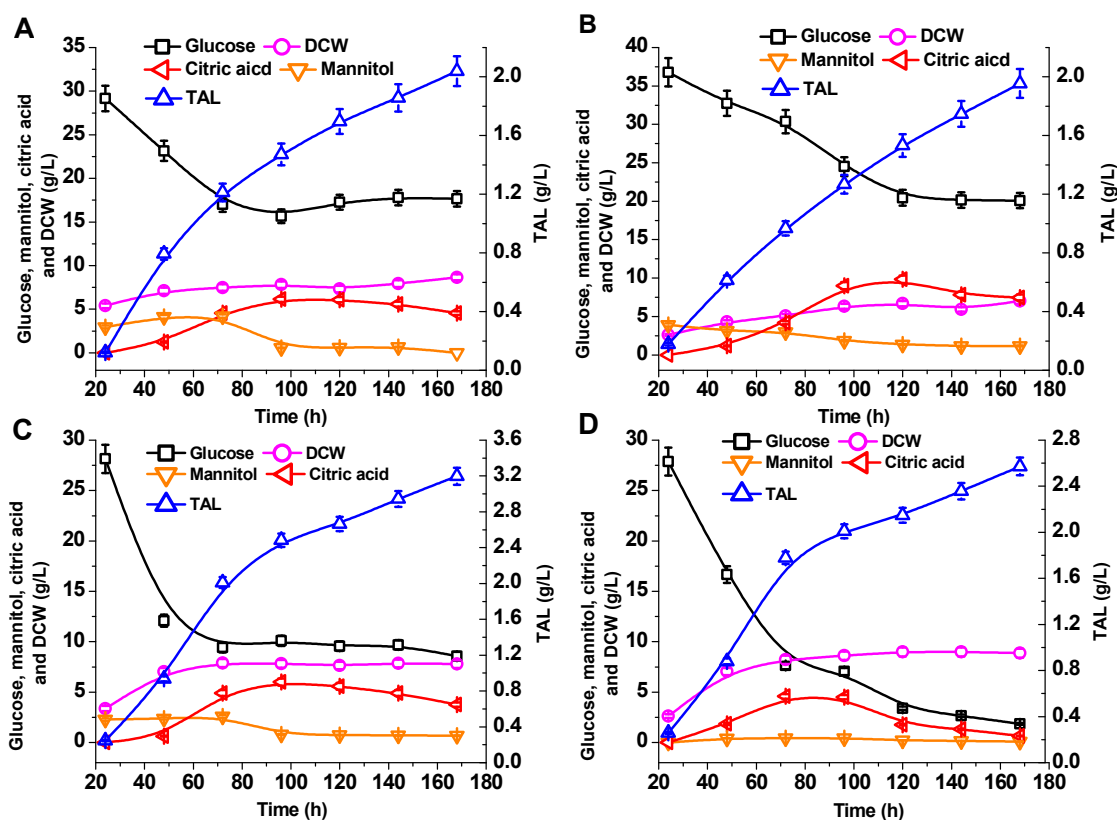

448

449 **Fig. 5** Improving TAL production by pH control and modulating precursor competing  
 450 pathway in glucose-minimal media. Fermentation profile of glucose consumption,  
 451 mannitol, dry cell weight, citric acid and TAL accumulation for strain *HLYali101*  
 452 cultivated in glucose-minimal media conditioned with PBS buffer (A) or  
 453 supplemented with 1 mg/L cerulenin (C). Fermentation profile of glucose  
 454 consumption, mannitol, dry cell weight, citric acid and TAL accumulation for strain  
 455 *HLYali103* cultivated in glucose-minimal media conditioned with PBS buffer (B) or  
 456 supplemented with 1 mg/L cerulenin (D).

457

458 Despite that glucose is a preferred carbon source for cell growth, we constantly  
 459 detected moderate or low TAL production in our engineered strains. The high TAL  
 460 specific yield (300.69 mg/gDCW, Fig. 4E and Table S4) was only obtained in acetate  
 461 media with pH control. We speculated that the low glucose-to-TAL yield was related  
 462 with the pH declining of strain *HLYali101* (Fig. 4D): the pH of the fermentation media  
 463 quickly decreased from 6 to 3.5 due to the accumulation of citric acid when glucose  
 464 was utilized. This significant pH variation may negatively affect strain physiology,  
 465 including cell membrane permeability and nutrients transportation process due to the  
 466 loss of proton driving force. This eventually led to the accumulation of byproduct  
 467 (mannitol and citric acid *et al*) and suboptimal TAL yield.

468 To compare how pH control may affect TAL production with the engineered

469 strain fermenting on glucose, we supplemented the minimal YNB media with 0.2 M  
470 phosphoric buffer solution (PBS, pH 6.0). Indeed, TAL production was increased to  
471 2.04 g/L at 168 h, which was an increase of 60.1% and 94.3% respectively, compared  
472 with the results from pH controlled (supplementary Fig. S1) and uncontrolled (Fig.  
473 4D) process. The major byproduct mannitol reached 4.2 g/L at 72 hour and citric acid  
474 reached 6.14 g/L at 96 h, and both were subsequently utilized (**Fig. 5A**). The biomass  
475 of strain *HLYali101* reached 8.66 g/L DCW with the TAL specific yield at 235.6  
476 mg/gDCW (**Fig. 5A** and Table S4), which is still 27.6% lower than the specific yield  
477 from acetic acid (**Fig. 4E**). The glucose-to-TAL yield was 91.23 mg/g, which was 3.4  
478 times higher than that of the pH uncontrolled fermentation process (**Fig. 4D** and Table  
479 S4). Strain *HLYali103* (orthogonal PDH expression) led to similar fermentation profile  
480 (**Fig. 5B**) when the glucose YNB media was conditioned with 0.2 M PBS buffer (pH  
481 6.0). This strain led to the accumulation of 7.01 g/L biomass with the glucose-to-TAL  
482 yield at 98.44 mg/g glucose, about 7.9% higher than the yield obtained from strain  
483 HLYali101. Similarly, only ~50% of glucose was utilized in both strain HLYali101  
484 and HLYali103 (**Fig. 5A** and **5B**), indicating the supplementation of  $\text{PO}_4^{3-}$  buffer may  
485 negatively impact the glucose uptake rate.

486 *Y. lipolytica* is a natural lipid producer capable of accumulating 30%~60% cell  
487 weight as lipid (Xu, Qiao et al. 2017). The internal fatty acid synthase (FAS) pathway  
488 strongly competes with TAL pathway for both acetyl-CoA and malonyl-CoA. In order  
489 to mitigate FAS competition, we attempted to use FAS inhibitor (cerulenin) to  
490 suppress lipid synthesis in our engineered strain. Cerulenin could irreversibly form a  
491 covalent adduct with the active site (cysteine residue) of  $\beta$ -ketoacyl-ACP synthase,  
492 inhibiting the incorporation of malonyl-CoA to the extending fatty acid backbone  
493 (Vance, Goldberg et al. 1972, Price, Choi et al. 2001). When 1 mg/L cerulenin was  
494 supplemented at 48 h, 3.2 g/L TAL was produced by strain *HLYali101* at 168 h (**Fig.**  
495 **5C**), a 57% increase compared with the result without cerulenin (**Fig. 5A**).  
496 Byproducts mannitol and citric acid was decreased to 0.67 g/L and 3.75 g/L at 168 h,  
497 respectively. Glucose was depleted relatively faster compared to the strain without  
498 cerulenin (**Fig. 5A**). And the specific TAL production reached to 363.6 mg/gDCW, a  
499 54% increase compared to the strain without cerulenin (**Fig. 5A** and Table S4).  
500 Similarly, strain *HLYali103* produced about 2.57 g/L TAL (**Fig. 5D**), a 32% increase  
501 compared to the strain without cerulenin (**Fig. 5B**). These results indicated that FAS  
502 pathway was the major competing pathway and malonyl-CoA flux became the main  
503 driver of TAL synthesis in the engineered strain HLYali101 and HLYali103. Taken  
504 together, pH control and inhibition of FAS activity were effective strategies for  
505 diverting malonyl-CoA flux to TAL synthesis.

506



507 **3.6 High-yield TAL production from acetic acid with chromosomally-integrated**  
508 **strains**

509

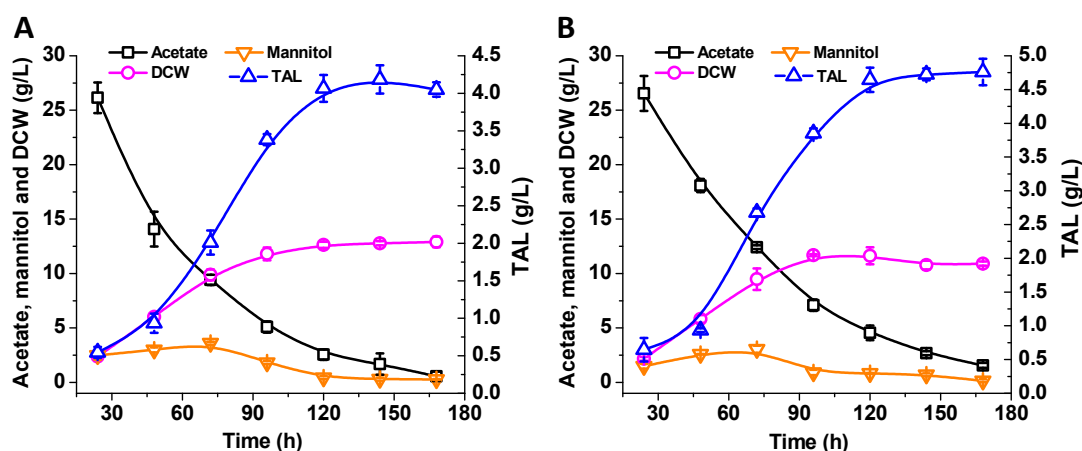

510

511 **Fig. 6.** Test of TAL production with chromosomally-integrated pathway. Fermentation  
512 profile of NaAc consumption, mannitol, dry cell weight and TAL accumulation in  
513 strains LHYali105 (A) and LHYali106 (B).

514

515 The low biomass (**Fig. 5C and 5D**) and significant cost of cerulenin (10 mg for  
516 \$272 from Sigma Aldrich) prohibits the supplementation of cerulenin as chemical  
517 inhibitors to modulate malonyl-CoA flux in the engineered strain. On the other hand,  
518 ACC1, the key metabolic node of malonyl-CoA source pathway, was primarily  
519 controlled through the phosphorylation of serine residues by Snf1-mediated AMP  
520 kinase. The overflow of glucose metabolism or nitrogen starvation activates Snf1  
521 kinase and slows down ACC1 activity (Hedbacker and Carlson 2008, Seip, Jackson et  
522 al. 2013, Zhang, Galdieri et al. 2013, Shi, Chen et al. 2014), which makes glucose a  
523 unfavorable carbon source for the production of malonyl-CoA-derived compounds.  
524 Since acetic acid could be directly converted to acetyl-CoA, we speculate that this  
525 acetyl-CoA shortcut may present little or no activation of the Snf1 kinase. In  
526 comparison with glucose, we hypothesize this alternative carbon source (acetic acid)  
527 will not cause inhibitory effect to the malonyl-CoA source pathway (ACC1).

528 To increase strain stability in acetic acid, we integrated the genes  
529 Gh2PS-ylMAE1-EcPDH-EcLplA and Gh2PS-ylMAE1-ylACC1-EcPDH-EcLplA (Fig.  
530 S2) into the chromosome of *Y. lipolytica*, leading to strains LHYali105 and LHYali106,  
531 respectively. The integrated strain LHYali105 yielded about 4.18 g/L TAL from YPA  
532 complex media (yeast extract, peptone and sodium acetate) in shake flask (**Fig. 6A**), a  
533 37% increase compared to the strain LHYali105 grown in glucose-based YPD (yeast  
534 extract, peptone and dextrose) media (supplementary Fig. S3). With the

535 complementation of cytosolic PDH pathway, the strain LHYali106 yielded about 4.76  
536 g/L TAL from YPA media (**Fig. 6B**), a 56% increase compared to the strain  
537 LHYali105 grown in YPD (supplementary Fig. S3). The biomass of LHYali106  
538 reached 11.68 g/L at the end of fermentation with little mannitol (3.05 g/L) but no  
539 citric acid formation in the fermentation broth (**Fig. 6B**). The specific TAL yield  
540 reaches 407.5 mg/gDCW, which is 12.1% higher than the strain with cerulenin  
541 supplementation (**Fig. 5C**). The acetate-to-TAL conversion yield was increased to  
542 0.149 g/g (Table S4), representing 31.9% of the theoretical maximum yield (0.467  
543 g/g). This result demonstrates that acetic acid could lead to much higher TAL yield,  
544 exceeding the capability when glucose was used as carbon sources. Meanwhile,  
545 acetate has not been explored widely as sole carbon source in industrial fermentation.  
546 This work highlights the potential of engineering *Y. lipolytica* as a promising  
547 microbial platform for commercial manufacturing of high-value polyketides from  
548 low-cost acetic acids (glacial acetic acids).

549

#### 550 **4. Conclusion**

551 In this work, triacetic acid lactone (TAL) biosynthetic pathway was constructed  
552 and optimized in oleaginous yeast *Y. lipolytica*. In addition to the codon-optimized  
553 2-pyrone synthase gene, we found that both endogenous acetyl-CoA carboxylase  
554 (ylACC1) and malic enzyme (ylMAE1) are critical for the efficient conversion of  
555 acetyl-CoA and malonyl-CoA to TAL. Acetyl-CoA is the central hub of carbon  
556 metabolism, connecting with glycolysis, Krebs cycle and lipid synthesis. To unleash  
557 the potential of the heterologous polyketide synthase pathway, we assessed various  
558 cytosolic acetyl-CoA pathways to improve TAL synthesis. A bacteria-derived  
559 pyruvate dehydrogenase complex (Ec-PDH) along its cognate lipolyating protein  
560 (Ec-lplA) were identified as the most efficient cytosolic acetyl-CoA routes to improve  
561 TAL production. The engineered strain could efficiently ferment glucose or sodium  
562 acetate (NaAc) to TAL. In particular, the TAL titer (g/L) and specific yield  
563 (mgTAL/gDCW) from acetic acid media exceeds the titer and the specific yield  
564 obtained in glucose media. An *in situ* pH indicator (bromocresol purple) was used  
565 as a real-time pH reporter for process optimization in shake flasks. Suboptimal level  
566 of TAL accumulation (~3.2 g/L) was observed in a pH-controlled fermentation when  
567 the glucose media was supplemented with expensive FAS inhibitor (cerulenin). When  
568 the engineered strain was cultivated with acetate as sole carbon source in the absence  
569 of cerulenin, the TAL production was increased to 4.76 g/L in the  
570 chromosomally-integrated strain. The acetate-to-TAL yield reaches 0.149 g/g,  
571 representing 31.9% of the theoretical maximum yield (0.467 g/g). Since acetate  
572 uptake pathway essentially bypasses the mitochondrial PDH steps, the feeding of

573 acetate creates a metabolic shortcut to acetyl-CoA. The carbon flux through this  
574 acetyl-CoA metabolic shortcut exceeds the carbon flux afforded by the native  
575 acetyl-CoA pathways. This alternative carbon sources present a metabolic advantage  
576 over glucose, which may not elicit or activate Snf1-mediated AMP kinase repressing  
577 ACC1 activity. Potentially, acetic acid could be a readily-available, low-cost carbon  
578 sources from Syngas fermentation, anerobic digestion or heterogenous catalysis  
579 (methanol carbonylation).

580 This report demonstrates that *Y. lipolytica* possesses superior acetate uptake  
581 pathway to support both cell growth and metabolite production. Our engineering  
582 strategies highlights that acetic acid could be utilized as low-cost and sustainable  
583 carbon feedstock for efficient production of plant-derived polyketides in oleaginous  
584 yeast species. More importantly, the use of metabolic shortcut may overcome many  
585 intrinsic pathway limitations (kinetic or thermodynamic limitations), and facilitate  
586 high carbon conversion efficiency and volumetric titer. Since TAL is the simplest  
587 polyketide scaffold, the reported work may also be translated to other microbial  
588 platforms for upgrading waste acetic acids to high-value compounds in an  
589 eco-friendly and cost-efficient manner.

590

#### 591 **Acknowledgements**

592 This work was supported by the Cellular & Biochem Engineering Program of  
593 the National Science Foundation under grant no.1805139. The authors would also like  
594 to acknowledge the Department of Chemical, Biochemical and Environmental  
595 Engineering at University of Maryland Baltimore County for funding support. HL  
596 would like to thank the China Scholarship Council for funding support.

#### 597 **Author contributions**

598 PX conceived the topic. HL and MM performed genetic engineering and  
599 fermentation experiments. HL and PX wrote the manuscript.

#### 600 **Conflicts of interests**

601 The authors declare that they have no competing interests. A provisional patent  
602 has been filed based on the results of this study.

603

604

605

606

607

608

609           **References**

- 610       Austin, M. B. and J. P. Noel (2003). "The chalcone synthase superfamily of type III polyketide  
611       synthases." Natural product reports **20**(1): 79-110.
- 612       Awasthi, D., L. Wang, M. S. Rhee, Q. Wang, D. Chauhiac, L. O. Ingram and K. T. Shanmugam (2018).  
613       "Metabolic engineering of *Bacillus subtilis* for production of D - lactic acid." Biotechnol Bioeng **115**(2):  
614       453-463.
- 615       Cardenas, J. and N. A. Da Silva (2014). "Metabolic engineering of *Saccharomyces cerevisiae* for the  
616       production of triacetic acid lactone." Metabolic Engineering **25**: 194-203.
- 617       Cardenas, J. and N. A. Da Silva (2016). "Engineering cofactor and transport mechanisms in  
618       *Saccharomyces cerevisiae* for enhanced acetyl-CoA and polyketide biosynthesis." Metabolic  
619       Engineering **36**: 80-89.
- 620       Chen, D.-C., J.-M. Beckerich and C. Gaillardin (1997). "One-step transformation of the dimorphic yeast  
621       *Yarrowia lipolytica*." Appl Microbiol Biotechnol **48**(2): 232-235.
- 622       Chen, Y., V. Siewers and J. Nielsen (2012). "Profiling of Cytosolic and Peroxisomal Acetyl-CoA  
623       Metabolism in *Saccharomyces cerevisiae*." PLOS ONE **7**(8): e42475.
- 624       Chia, M., T. J. Schwartz, B. H. Shanks and J. A. Dumesic (2012). "Triacetic acid lactone as a potential  
625       biorenewable platform chemical." Green Chemistry **14**(7): 1850-1853.
- 626       Cronan, J. E. (2016). "Assembly of Lipoic Acid on Its Cognate Enzymes: an Extraordinary and Essential  
627       Biosynthetic Pathway." Microbiology and Molecular Biology Reviews **80**(2): 429.
- 628       El-Ashgar, N. M., A. I. El-Basioni, I. M. El-Nahhal, S. M. Zourob, T. M. El-Agez and S. A. Taya (2012).  
629       "Sol-Gel thin films immobilized with bromocresol purple pH-sensitive indicator in presence of  
630       surfactants." ISRN Analytical Chemistry **2012**.
- 631       Emanuelsson, O., H. Nielsen, S. Brunak and G. von Heijne (2000). "Predicting Subcellular Localization  
632       of Proteins Based on their N-terminal Amino Acid Sequence." Journal of Molecular Biology **300**(4):  
633       1005-1016.
- 634       Flores, C.-L., C. Rodríguez, T. Petit and C. Gancedo (2000). "Carbohydrate and energy-yielding  
635       metabolism in non-conventional yeasts." FEMS microbiology reviews **24**(4): 507-529.
- 636       Gibson, D. G., L. Young, R.-Y. Chuang, J. C. Venter, C. A. Hutchison III and H. O. Smith (2009). "Enzymatic  
637       assembly of DNA molecules up to several hundred kilobases." Nature methods **6**(5): 343.
- 638       Grabowska, D. and A. Chelstowska (2003). "The ALD6 gene product is indispensable for providing  
639       NADPH in yeast cells lacking glucose-6-phosphate dehydrogenase activity." World J Biol Chem **278**:  
640       13984-13988.
- 641       Hansen, C. A. (2002). Chemo-enzymatic Synthesis of Aromatics Via Non-shikimate Pathway  
642       Intermediates, Michigan State University. Department of Chemistry.
- 643       Hedbacker, K. and M. Carlson (2008). "SNF1/AMPK pathways in yeast." Front Biosci **13**: 2408-2420.
- 644       Hermes, F. A. and J. E. Cronan (2013). "The role of the *Saccharomyces cerevisiae* lipoate protein ligase  
645       homologue, Lip3, in lipoic acid synthesis." Yeast **30**(10): 415-427.
- 646       Hsu, H. E., T. N. Liu, C. S. Yeh, T. H. Chang, Y. C. Lo and C. F. Kao (2015). "Feedback Control of Snf1  
647       Protein and Its Phosphorylation Is Necessary for Adaptation to Environmental Stress." J Biol Chem  
648       **290**(27): 16786-16796.
- 649       Jez, J. M., M. B. Austin, J.-L. Ferrer, M. E. Bowman, J. Schröder and J. P. Noel (2000). "Structural control  
650       of polyketide formation in plant-specific polyketide synthases." Chemistry & Biology **7**(12): 919-930.
- 651       Jez, J. M., J. L. Ferrer, M. E. Bowman, M. B. Austin, J. Schröder, R. A. Dixon and J. P. Noel (2001).  
652       "Structure and mechanism of chalcone synthase-like polyketide synthases." Journal of Industrial

- 653 [Microbiology and Biotechnology](#) **27**(6): 393-398.
- 654 Kabran, P., T. Rossignol, C. Gaillardin, J. M. Nicaud and C. Neuvéglise (2012). "Alternative splicing  
655 regulates targeting of malate dehydrogenase in *Yarrowia lipolytica*." [DNA Res](#) **19**(3): 231-244.
- 656 Kozak, B. U., H. M. van Rossum, K. R. Benjamin, L. Wu, J.-M. G. Daran, J. T. Pronk and A. J. A. van Maris  
657 (2014). "Replacement of the *Saccharomyces cerevisiae* acetyl-CoA synthetases by alternative  
658 pathways for cytosolic acetyl-CoA synthesis." [Metabolic Engineering](#) **21**: 46-59.
- 659 Kozak, B. U., H. M. van Rossum, M. A. Luttik, M. Akeroyd, K. R. Benjamin, L. Wu, S. de Vries, J.-M.  
660 Daran, J. T. Pronk and A. J. van Maris (2014). "Engineering acetyl coenzyme A supply: functional  
661 expression of a bacterial pyruvate dehydrogenase complex in the cytosol of *Saccharomyces*  
662 *cerevisiae*." [Mbio](#) **5**(5): e01696-01614.
- 663 Kozak, B. U., H. M. van Rossum, M. A. H. Luttik, M. Akeroyd, K. R. Benjamin, L. Wu, S. de Vries, J.-M.  
664 Daran, J. T. Pronk and A. J. A. van Maris (2014). "Engineering Acetyl Coenzyme A Supply: Functional  
665 Expression of a Bacterial Pyruvate Dehydrogenase Complex in the Cytosol of >*Saccharomyces cerevisiae*</span>." [mBio](#) **5**(5): e01696-01614.
- 666 [mBio](#) **5**(5): e01696-01614.
- 667 Krivoruchko, A., Y. Zhang, V. Siewers, Y. Chen and J. Nielsen (2015). "Microbial acetyl-CoA metabolism  
668 and metabolic engineering." [Metabolic Engineering](#) **28**: 28-42.
- 669 Krivoruchko, A., Y. Zhang, V. Siewers, Y. Chen and J. Nielsen (2015). "Microbial acetyl-CoA metabolism  
670 and metabolic engineering." [Metabolic Engineering](#) **28**(Supplement C): 28-42.
- 671 Leonard, E., K. Lim, P. Saw and M. Koffas (2007). "Engineering central metabolic pathways for  
672 high-level flavonoid production in *Escherichia coli*." [Applied and Environmental Microbiology](#):  
673 3877-3886.
- 674 Li, Y., S. Qian, R. Dunn and P. C. Cirino (2018). "Engineering *Escherichia coli* to increase triacetic acid  
675 lactone (TAL) production using an optimized TAL sensor-reporter system." [J Ind Microbiol Biotechnol](#).
- 676 Liu, H., H. Hu, Y. Jin, X. Yue, L. Deng, F. Wang and T. Tan (2017). "Co-fermentation of a mixture of  
677 glucose and xylose to fumaric acid by *Rhizopus arrhizus* RH 7-13-9#." [Bioresour Technol](#) **233**: 30-33.
- 678 Liu, H., M. Marsafari, L. Deng and P. Xu (2019). "Understanding lipogenesis by dynamically profiling  
679 transcriptional activity of lipogenic promoters in *Yarrowia lipolytica*." [Applied Microbiology and](#)  
680 [Biotechnology](#).
- 681 Liu, H., S. Zhao, Y. Jin, X. Yue, L. Deng, F. Wang and T. Tan (2017). "Production of fumaric acid by  
682 immobilized *Rhizopus arrhizus* RH 7-13-9# on loofah fiber in a stirred-tank reactor." [Bioresour Technol](#)  
683 **244**(Part 1): 929-933.
- 684 Lv, Y., H. Edwards, J. Zhou and P. Xu (2019). "Combining 26s rDNA and the Cre-loxP system for iterative  
685 gene integration and efficient marker curation in *Yarrowia lipolytica*." [ACS Synthetic Biology](#).
- 686 Markham, K. A. and H. S. Alper (2018). "Synthetic Biology Expands the Industrial Potential of *Yarrowia*  
687 *lipolytica*." [Trends in biotechnology](#).
- 688 Markham, K. A., C. M. Palmer, M. Chwatko, J. M. Wagner, C. Murray, S. Vazquez, A. Swaminathan, I.  
689 Chakravarty, N. A. Lynd and H. S. Alper (2018). "Rewiring *Yarrowia lipolytica* toward triacetic acid  
690 lactone for materials generation." [Proceedings of the National Academy of Sciences](#): 201721203.
- 691 Mekouar, M., I. Blanc-Lenfle, C. Ozanne, C. Da Silva, C. Cruaud, P. Wincker, C. Gaillardin and C.  
692 Neuvéglise (2010). "Detection and analysis of alternative splicing in *Yarrowia lipolytica* reveal  
693 structural constraints facilitating nonsense-mediated decay of intron-retaining transcripts." [Genome](#)  
694 [Biology](#) **11**(6): R65-R65.
- 695 Mihaylova, M. M. and R. J. Shaw (2011). "The AMPK signalling pathway coordinates cell growth,
- 696

697 autophagy and metabolism." Nature cell biology **13**(9): 1016-1023.

698 Miller, J. R., R. W. Busby, S. W. Jordan, J. Cheek, T. F. Henshaw, G. W. Ashley, J. B. Broderick, J. E. Cronan  
699 and M. A. Marletta (2000). "Escherichia coli LipA is a lipoyl synthase: in vitro biosynthesis of lipoylated  
700 pyruvate dehydrogenase complex from octanoyl-acyl carrier protein." Biochemistry **39**(49):  
701 15166-15178.

702 Minard, K. I., G. T. Jennings, T. M. Loftus, D. Xuan and L. McAlister-Henn (1998). "Sources of NADPH  
703 and expression of mammalian NADP<sup>+</sup>-specific isocitrate dehydrogenases in *Saccharomyces*  
704 *cerevisiae*." J Biol Chem **273**(47): 31486-31493.

705 Minard, K. I. and L. McAlister-Henn (2005). "Sources of NADPH in yeast vary with carbon source." J  
706 Biol Chem **280**: 39890-39896.

707 Nielsen, H., J. Engelbrecht, S. Brunak and G. von Heijne (1997). "Identification of prokaryotic and  
708 eukaryotic signal peptides and prediction of their cleavage sites." Protein Eng **10**(1): 1-6.

709 Nielsen, J. (2014). "Synthetic Biology for Engineering Acetyl Coenzyme A Metabolism in Yeast." mBio  
710 **5**(6).

711 Pendini, N. R., L. M. Bailey, G. W. Booker, M. C. Wilce, J. C. Wallace and S. W. Polyak (2008). "Microbial  
712 biotin protein ligases aid in understanding holocarboxylase synthetase deficiency." Biochimica et  
713 Biophysica Acta (BBA) - Proteins and Proteomics **1784**(7): 973-982.

714 Price, A. C., K.-H. Choi, R. J. Heath, Z. Li, S. W. White and C. O. Rock (2001). "Inhibition of  
715  $\beta$ -ketoacyl-acyl carrier protein synthases by thiolactomycin and cerulenin structure and mechanism."  
716 Journal Of Biological Chemistry **276**(9): 6551-6559.

717 Qian, Q., J. Zhang, M. Cui and B. Han (2016). "Synthesis of acetic acid via methanol hydrocarboxylation  
718 with CO<sub>2</sub> and H<sub>2</sub>." Nature Communications **7**: 11481.

719 Qiao, K., T. M. Wasylenko, K. Zhou, P. Xu and G. Stephanopoulos (2017). "Lipid production in *Yarrowia*  
720 *lipolytica* is maximized by engineering cytosolic redox metabolism." Nat Biotechnol **35**(2): 173-177.

721 Ratledge, C. (2014). "The role of malic enzyme as the provider of NADPH in oleaginous  
722 microorganisms: a reappraisal and unsolved problems." Biotechnology Letters **36**(8): 1557-1568.

723 Ratledge, C. and J. P. Wynn (2002). "The biochemistry and molecular biology of lipid accumulation in  
724 oleaginous microorganisms." Adv Appl Microbiol **51**.

725 Rodríguez-Frómata, R. A., A. Gutiérrez, S. Torres-Martínez and V. Garre (2013). "Malic enzyme activity  
726 is not the only bottleneck for lipid accumulation in the oleaginous fungus *Mucor circinelloides*."  
727 Applied Microbiology and Biotechnology **97**(7): 3063-3072.

728 Seip, J., R. Jackson, H. He, Q. Zhu and S.-P. Hong (2013). "Snf1 Is a Regulator of Lipid Accumulation in  
729 *Yarrowia lipolytica*." Applied and Environmental Microbiology **79**(23): 7360-7370.

730 Shi, S., Y. Chen, V. Siewers and J. Nielsen (2014). "Improving Production of Malonyl Coenzyme  
731 A-Derived Metabolites by Abolishing Snf1-Dependent Regulation of Acc1." mBio **5**(3).

732 Sulo, P. and N. C. Martin (1993). "Isolation and characterization of LIP5. A lipoate biosynthetic locus of  
733 *Saccharomyces cerevisiae*." Journal of Biological Chemistry **268**(23): 17634-17639.

734 Suye, S. and S. Yokoyama (1985). "NADPH production from NADP<sup>+</sup> using malic enzyme of  
735 *Achromobacter parvulus* IFO-13182." Enzyme and Microbial Technology **7**(9): 418-424.

736 Tang, S.-Y., S. Qian, O. Akinterinwa, C. S. Frei, J. A. Gredell and P. C. Cirino (2013). "Screening for  
737 enhanced triacetic acid lactone production by recombinant *Escherichia coli* expressing a designed  
738 triacetic acid lactone reporter." Journal Of the American Chemical Society **135**(27): 10099-10103.

739 van Rossum, H. M., B. U. Kozak, J. T. Pronk and A. J. A. van Maris (2016). "Engineering cytosolic  
740 acetyl-coenzyme A supply in *Saccharomyces cerevisiae*: Pathway stoichiometry, free-energy

- 741 conservation and redox-cofactor balancing." Metabolic Engineering **36**: 99-115.
- 742 Vance, D., I. Goldberg, O. Mitsuhashi, K. Bloch, S. Ōmura and S. Nomura (1972). "Inhibition of fatty  
743 acid synthetases by the antibiotic cerulenin." Biochemical And Biophysical Research Communications  
744 **48**(3): 649-656.
- 745 Wasylenko, T. M., W. S. Ahn and G. Stephanopoulos (2015). "The oxidative pentose phosphate  
746 pathway is the primary source of NADPH for lipid overproduction from glucose in *Yarrowia lipolytica*."  
747 Metab Eng **30**: 27-39.
- 748 Weissermel, K. (2008). Industrial organic chemistry, John Wiley & Sons.
- 749 Wong, L., J. Engel, E. Jin, B. Holdridge and P. Xu (2017). "YaliBricks, a versatile genetic toolkit for  
750 streamlined and rapid pathway engineering in *Yarrowia lipolytica*." Metabolic engineering  
751 communications **5**: 68-77.
- 752 Wong, L., B. Holdridge, J. Engel and P. Xu (2019). Genetic Tools for Streamlined and Accelerated  
753 Pathway Engineering in *Yarrowia lipolytica*. Microbial Metabolic Engineering: Methods and Protocols.  
754 C. N. S. Santos and P. K. Ajikumar. New York, NY, Springer New York: 155-177.
- 755 Wynn, J. P., A. bin Abdul Hamid and C. Ratledge (1999). "The role of malic enzyme in the regulation of  
756 lipid accumulation in filamentous fungi." Microbiology **145 ( Pt 8)**: 1911-1917.
- 757 Xie, D., Z. Shao, J. Achkar, W. Zha, J. W. Frost and H. Zhao (2006). "Microbial synthesis of triacetic acid  
758 lactone." Biotechnology and Bioengineering **93**(4): 727-736.
- 759 Xie, D., Z. Shao, J. Achkar, W. Zha, J. W. Frost and H. Zhao (2006). "Microbial synthesis of triacetic acid  
760 lactone." Biotechnol Bioeng **93**(4): 727-736.
- 761 Xu, J., N. Liu, K. Qiao, S. Vogg and G. Stephanopoulos (2017). "Application of metabolic controls for the  
762 maximization of lipid production in semicontinuous fermentation." Proceedings of the National  
763 Academy of Sciences **114**(27): E5308-E5316.
- 764 Xu, P., Q. Gu, W. Wang, L. Wong, A. G. W. Bower, C. H. Collins and M. A. G. Koffas (2013). "Modular  
765 optimization of multi-gene pathways for fatty acids production in *E. coli*." Nature Communications **4**:  
766 1409.
- 767 Xu, P., L. Li, F. Zhang, G. Stephanopoulos and M. Koffas (2014). "Improving fatty acids production by  
768 engineering dynamic pathway regulation and metabolic control." Proceedings of the National  
769 Academy of Sciences **111**(31): 11299-11304.
- 770 Xu, P., K. Qiao, W. S. Ahn and G. Stephanopoulos (2016). "Engineering *Yarrowia lipolytica* as a platform  
771 for synthesis of drop-in transportation fuels and oleochemicals." Proceedings of the National Academy  
772 of Sciences **113**(39): 10848-10853.
- 773 Xu, P., K. Qiao and G. Stephanopoulos (2017). "Engineering oxidative stress defense pathways to build  
774 a robust lipid production platform in *Yarrowia lipolytica*." Biotechnol Bioeng **114**(7): 1521-1530.
- 775 Xu, P., S. Ranganathan, Z. Fowler, C. Maranas and M. Koffas (2011). "Genome-scale metabolic network  
776 modeling results in minimal interventions that cooperatively force carbon flux towards malonyl-CoA."  
777 Metabolic Engineering **13**(5): 578-587.
- 778 Yu, J., J. Landberg, F. Shavarebi, V. Bilanchone, A. Okerlund, U. Wanninayake, L. Zhao, G. Kraus and S.  
779 Sandmeyer (2018). "Bioengineering triacetic acid lactone production in *Yarrowia lipolytica* for  
780 pogostone synthesis." Biotechnol Bioeng.
- 781 Zambanini, T., W. Kleineberg, E. Sarikaya, J. M. Buescher, G. Meurer, N. Wierckx and L. M. Blank (2016).  
782 "Enhanced malic acid production from glycerol with high-cell density *Ustilago trichophora* T21  
783 cultivations." Biotechnology for Biofuels **9**(1): 135.
- 784 Zha, W., S. B. Rubin-Pitel, Z. Shao and H. Zhao (2009). "Improving cellular malonyl-CoA level in

785 Escherichia coli via metabolic engineering." Metabolic Engineering **11**(3): 192-198.  
786 Zhang, H., L. Zhang, H. Chen, Y. Q. Chen, C. Ratledge, Y. Song and W. Chen (2013). "Regulatory  
787 properties of malic enzyme in the oleaginous yeast, *Yarrowia lipolytica*, and its non-involvement in  
788 lipid accumulation." Biotechnology Letters **35**(12): 2091-2098.  
789 Zhang, M., L. Galdieri and A. Vancura (2013). "The Yeast AMPK Homolog SNF1 Regulates Acetyl  
790 Coenzyme A Homeostasis and Histone Acetylation." Molecular and Cellular Biology **33**(23):  
791 4701-4717.  
792
